# Supplementary material
Source: publisher figshare collection journal article supplement (https://gsapubs.figshare.com/articles/dataset/_/16920472)
Supplement: Supplementary file 1 [file 3]

**Supplemental Material for** Currie, C.A., and Copeland, P., 2021, Numerical models of Farallon plate subduction: Creating and removing a flat slab: Geosphere, <https://doi.org/10.1130/GES02393.1>.

### **Animation Captions**

Animation 1. Evolution of Model 1 showing the full model domain. The oceanic plateau remains metastable (and thus buoyant) throughout the model run. M—metastable basalt; E—eclogite; H—hydrated continental mantle lithosphere.

Animation 2. Evolution of Model 9 showing the full model domain. The oceanic plateau crust undergoes densification by  $500 \text{ kg/m}^3$  from 30 to 40 m.y. M—metastable basalt; E—eclogite; H—hydrated continental mantle lithosphere.

Animation 3. Evolution of Model 23 showing the full model domain. The oceanic plateau crust undergoes densification by  $500 \text{ kg/m}^3$  from 30 to 40 m.y., and the overlying continental mantle lithosphere weakens by a factor of 10 over the same time frame. M—metastable basalt; E—eclogite; H—hydrated continental mantle lithosphere.
